# Supplementary material
Source: HighWire-hosted journal article supplement (https://erj.ersjournals.com/content/54/4/1900918)
Supplement: inline-supplementary-material-1 [file inline-supplementary-material-1.pdf]

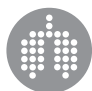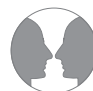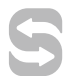

SHAREABLE PDF

# A transcutaneous carbon dioxide monitor is a useful tool with known caveats

Mauro Maniscalco and Salvatore Fuschillo

**Affiliation:** Istituti Clinici Scientifici Maugeri IRCCS, Pulmonary Rehabilitation Unit of the Telese Terme Institute, Pavia, Italy.

**Correspondence:** Mauro Maniscalco, Istituti Clinici Scientifici Maugeri IRCCS, Via Maugeri 4, 27100, Pavia, Italy. E-mail: [mauro.maniscalco@icsmaugeri.it](mailto:mauro.maniscalco@icsmaugeri.it)

 @ERSpublications

**Although transcutaneous carbon dioxide measurement cannot completely replace conventional blood gas analysis, transcutaneous carbon dioxide sensors could be used in patients with variable levels of hypercapnia also in an acute setting** <http://bit.ly/2kliEXx>

**Cite this article as:** Maniscalco M, Fuschillo S. A transcutaneous carbon dioxide monitor is a useful tool with known caveats. *Eur Respir J* 2019; 54: 1900918 [<https://doi.org/10.1183/13993003.00918-2019>].

This single-page version can be shared freely online.

*To the Editor:*

We have read with great interest the article by MUMMERY *et al.* [1] on the use of transcutaneous carbon dioxide tension ( $P_{tcCO_2}$ ) as a means of measuring carbon dioxide in the acute, unselected medical setting. The authors compared the results of gold standard arterial blood gas analysis sampling with values of  $P_{tcCO_2}$  measured by Resmed SenTec monitor (SenTec AG, Therwil, Switzerland) in 50 patients admitted to hospital for different diseases, including respiratory problems, non-respiratory sepsis, cardiovascular diseases and other medical diagnoses.
